# Supplementary material for: The Li–CO2 battery: a novel method for CO2 capture and utilization
Source: Royal Society of Chemistry journal article supplement (doi:10.1039/c3ra40394g), 2013-01-01
Supplement: c3ra40394g.pdf [file c3ra40394g.pdf]

# Supporting Information For: The Li-CO<sub>2</sub> Battery: A Novel Method for CO<sub>2</sub> Capture and Utilization

Shaomao Xu,<sup>a</sup> Shyamal K. Das<sup>a</sup> and Lynden A. Archer<sup>a,\*</sup>

## DEMS Characterization of gas phase product

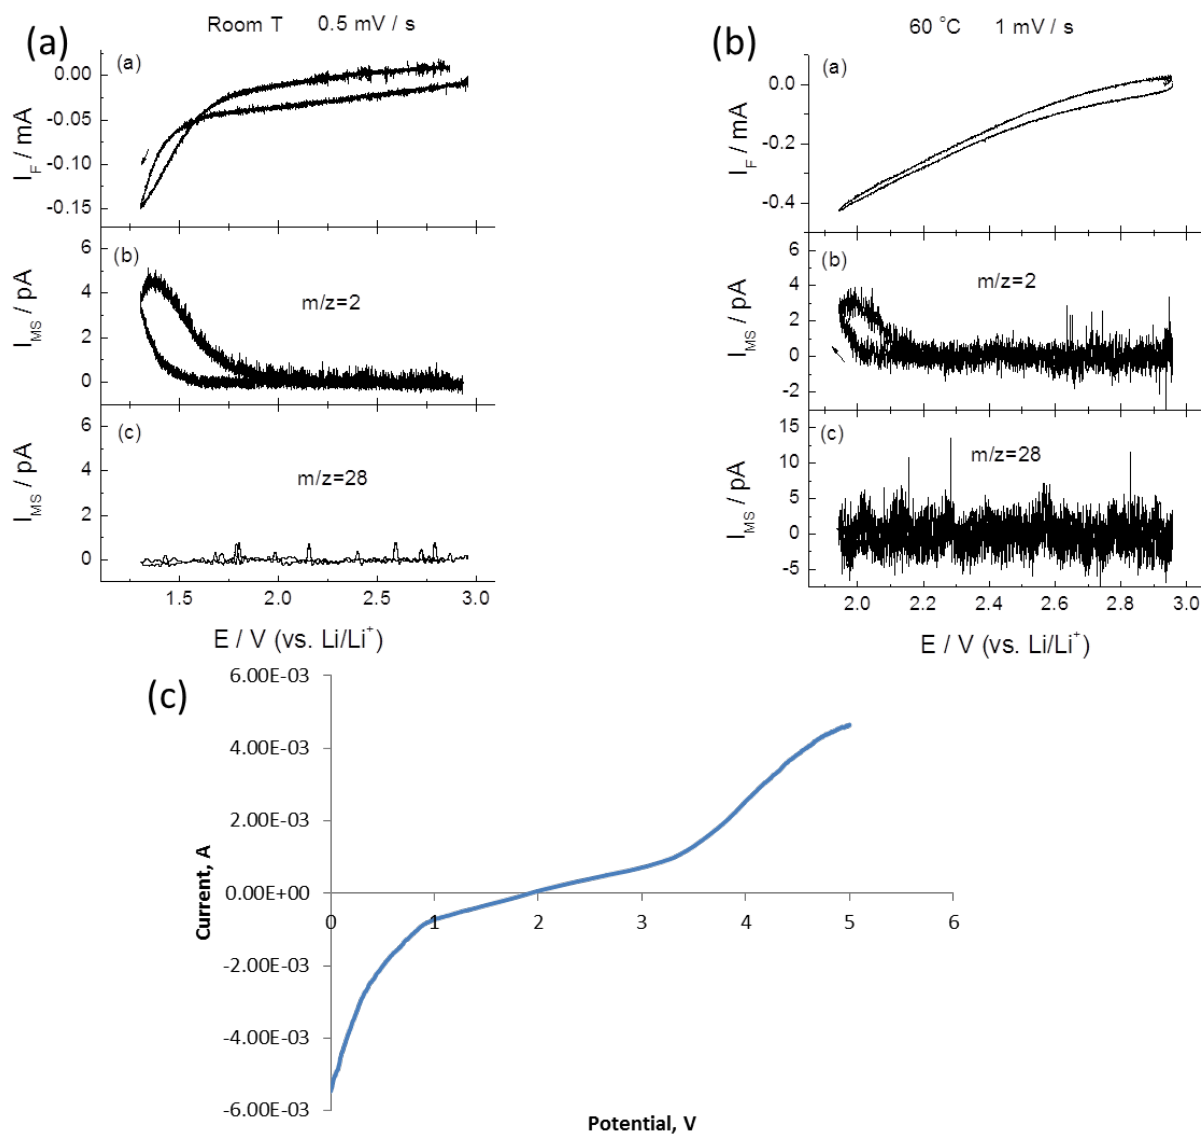

**Fig. S1** DEMS analysis of gas phase products for Li-CO<sub>2</sub> battery. at (a) room temperature (b) 60°C and (c) cyclic voltammetry of Li-CO<sub>2</sub> battery

From Figure S2(a) and (b), it can be easily seen that there is no CO (MW=28) evolution. However, the evolution of H<sub>2</sub> was detected at low potential. This is caused by the decomposition of the electrolyte, as shown in the cyclic voltammetry (Figure S2(c)).

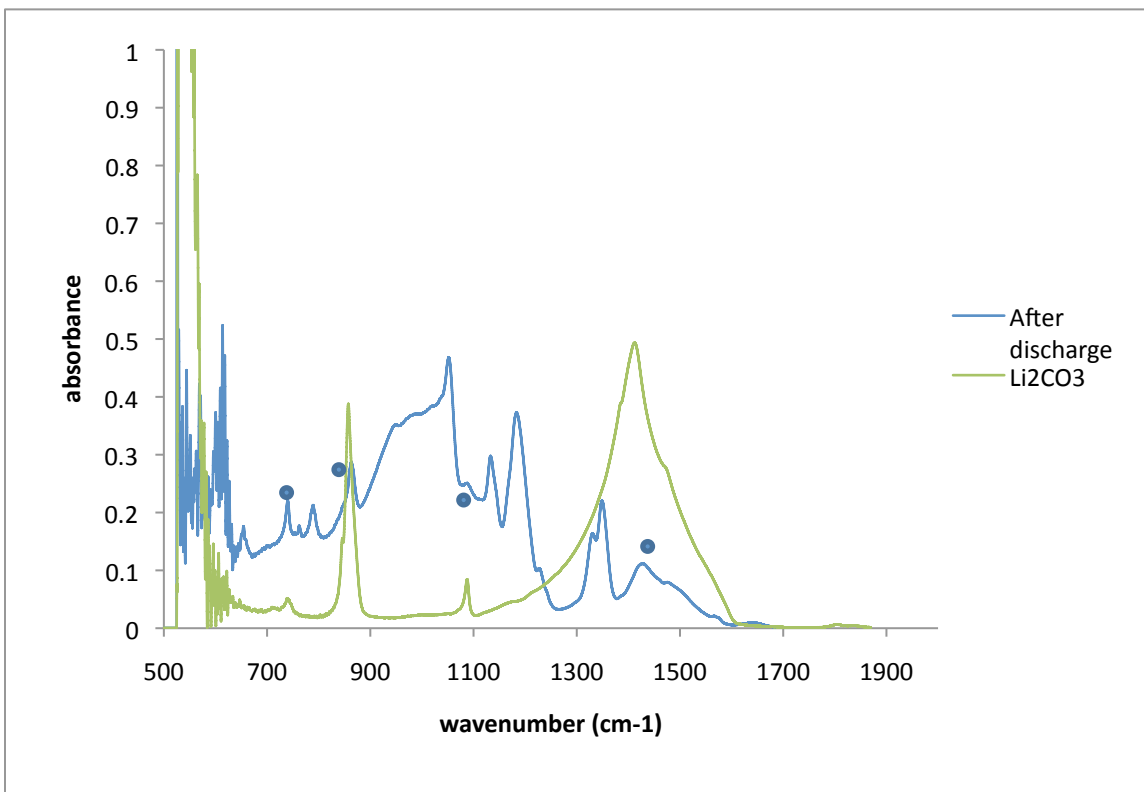

Figure S1: Ex-situ FTIR spectrum of the electrode after discharge at 100°C

The peaks emphasized with a blue dot are from the discharge product, Li<sub>2</sub>CO<sub>3</sub>. The other peaks are from the electrolyte. [1]

#### Reference:

1. Das, S. K., Xu, S., Emwas, A., Lu, Y., Srivastava, S. and Archer, L. A., "High Energy

Lithium-Oxygen Batteries – Transport Barriers and Thermodynamics”, *Energy Environ. Sci.*,  
**5**, 8927 (2012)
